# Supplementary material for: How ice grows from premelting films and water droplets
Source: Springer Nature journal article supplement (doi:10.1038/s41467-020-20318-6), 2021-01-11
Supplement: 41467_2020_20318_MOESM3_ESM.pdf [file 41467_2020_20318_MOESM3_ESM.pdf]

## Description of Additional Supplementary Files

**File Name:** Supplementary Data 1

**Description:** GROMACS Configuration file of bulk ice with a random hydrogen network satisfying the ice rules.

**File Name:** Supplementary Movie 1

**Description:** Dynamics of a terrace in the activated growth region. Movie corresponding to Fig. 4 (a-e).

**File Name:** Supplementary Movie 2

**Description:** Dynamics of a liquid droplet quenched below the kinetic liquid-vapor coexistence line. Movie corresponding to Fig. 4 (f-j).

**File Name:** Supplementary Movie 3

**Description:** Growth of a liquid droplet above the kinetic liquid-vapor coexistence line. Movie corresponding to Fig. 5 (a-e).

**File Name:** Supplementary Movie 4

**Description:** Dynamics of a liquid droplet above the  $\alpha$  to  $\beta$  transition line. Movie corresponding to Fig. 5 (f-j).

**File Name:** Supplementary Movie 5

**Description:** Dynamics of a liquid droplet above the kinetic liquid-vapor coexistence line. Movie corresponding to Supplementary Figure 2.

**File Name:** Supplementary Movie 6

**Description:** Dynamics of a liquid droplet past the kinetic spinodal line. Movie corresponding to Supplementary Figure 3.
